# Supplementary material
Source: publisher figshare collection journal article supplement (https://karger.figshare.com/ndownloader/files/18575351)
Supplement: Supplementary file 1 [file 18575351]

Supplementary material

Video 1- She is trying to say her name. This video was recorded in April 8th, 2019, 17 days after starting cannabis extract. We can also see the rigidity of her limbs. We do not have previous videos, but before taking the oil she was not able to speak and when trying to say her name she would utter without moving her lips.

Video 2- saying her name in May 19th (58 days of treatment).

Video 3- walking with assistance May 1st (40 days of treatment). Before cannabis oil she was not able to stand or walk

Video 4 – speaking with her son (22 weeks of treatment)

Video 5- walking faster with assistance (22 weeks of treatment)

THE PERSON WHO IS ASSISTING HER TO WALK IS HER SON, THE PERSON WHO ALSO SIGNED THE PATIENT CONSENT FORM.

HE ALSO STATED THAT AGREES TO PUBLISH HID IMAGENS IN THE BACK OF THE CONSENT FORM (PICTURE)
